# Supplementary material
Source: publisher figshare collection journal article supplement (https://sage.figshare.com/ndownloader/files/36009542)
Supplement: Supplementary file 1 [file 36009542]

| **Sex: Female** | **Total Instances Observed (%), N = Total Evaluations Performed** | | | |
| --- | --- | --- | --- | --- |
| **Clinical Observation** | **Analysis of Deviance p-value** | **Cambodian** | **Chinese** | **Vietnamese** |
| Abdomen Distended | 0.59118 | 3 (0.03%), N=8759 | 28 (0.09%), N=29860 | - |
| Abrasion(s) | < 0.0001 | 202 (2.31%), N=8759 | 448 (1.5%), N=29860 | 139 (1.12%), N=12388 |
| Activity Decreased | 0.54553 | - | 1 (0%), N=29860 | 1 (0.01%), N=12388 |
| Amputated | - | - | 3 (0.01%), N=29860 | - |
| Annular Constriction | 0.62535 | 331 (3.78%), N=8759 | 107 (0.36%), N=29860 | - |
| Ataxia | 0.54553 | - | 1 (0%), N=29860 | 1 (0.01%), N=12388 |
| Behavior Aggressive | 0.00809 | 2 (0.02%), N=8759 | 9 (0.03%), N=29860 | 1 (0.01%), N=12388 |
| Bruise | - | - | 330 (0.09%), N=358320 | - |
| Coprophagy | - | - | 8 (0.01%), N=89580 | - |
| Deformity | 0.00124 | 152 (1.74%), N=8759 | 233 (0.78%), N=29860 | 32 (0.26%), N=12388 |
| Dehiscence | - | - | 1 (0%), N=29860 | - |
| Digit(s) Missing | 0.37939 | 10 (0.11%), N=8759 | 130 (0.44%), N=29860 | - |
| Discharge | < 0.0001 | 566 (6.46%), N=8759 | 1313 (4.4%), N=29860 | 266 (2.15%), N=12388 |
| Discoloration | - | 3 (0.02%), N=17518 | - | - |
| Edema | - | - | 3 (0.01%), N=59720 | - |
| Emesis | < 0.0001 | 27 (0.31%), N=8759 | 112 (0.38%), N=29860 | 13 (0.1%), N=12388 |
| Eyelid Partially/Completely Closed | - | - | 17 (0.03%), N=59720 | - |
| Fecal Smearing | 0.00382 | 94 (1.07%), N=8759 | 89 (0.3%), N=29860 | 8 (0.06%), N=12388 |
| Feces Discolored | < 0.0001 | 48 (0.55%), N=8759 | 297 (0.99%), N=29860 | 2584 (20.86%), N=12388 |
| Feces Few/Absent | - | - | - | 252 (0.2%), N=123880 |
| Feces Hard | - | - | 1 (0%), N=29860 | - |
| Feces Mucoid | 0.00787 | 4 (0.05%), N=8759 | 13 (0.04%), N=29860 | - |
| Feces Soft | < 0.0001 | 1054 (12.03%), N=8759 | 3735 (12.51%), N=29860 | 924 (7.46%), N=12388 |
| Feces Watery | < 0.0001 | 437 (4.99%), N=8759 | 2287 (7.66%), N=29860 | 816 (6.59%), N=12388 |
| Hair Absent | 0.98516 | 1 (0.01%), N=8759 | 9 (0.03%), N=29860 | - |
| Hair Oily | - | - | - | 20 (0.08%), N=24776 |
| Hair Sparse | < 0.0001 | 3095 (35.34%), N=8759 | 11914 (39.9%), N=29860 | 5570 (44.96%), N=12388 |
| Hypersensitive To Touch | - | 1 (0.01%), N=8759 | - | - |
| Inappetence | 0.00057 | 7 (0.08%), N=8759 | 101 (0.34%), N=29860 | 30 (0.24%), N=12388 |
| Laceration | < 0.0001 | 42 (0.48%), N=8759 | 74 (0.25%), N=29860 | 8 (0.06%), N=12388 |
| Lacrimation | - | - | 1 (0%), N=29860 | - |
| Limb Function Impaired | 0.31248 | - | 20 (0.07%), N=29860 | 5 (0.04%), N=12388 |
| Loss Of Skin Elasticity | 0.97793 | 1 (0.01%), N=8759 | 10 (0.03%), N=29860 | 2 (0.02%), N=12388 |
| Material In Pan/Bedding | < 0.0001 | 74 (0.84%), N=8759 | 418 (1.4%), N=29860 | 229 (1.85%), N=12388 |
| No Abnormalities Detected | < 0.0001 | 2921 (33.35%), N=8759 | 10209 (34.19%), N=29860 | 2465 (19.9%), N=12388 |
| Nail Missing | 0.00002 | 9 (0.1%), N=8759 | 19 (0.06%), N=29860 | 182 (1.47%), N=12388 |
| Nipple Enlargement | 0.00669 | 16 (0.18%), N=8759 | 3 (0.01%), N=29860 | - |
| Nodule | 0.00004 | 212 (2.42%), N=8759 | 216 (0.72%), N=29860 | 308 (2.49%), N=12388 |
| Obese | 0.06381 | 14 (0.16%), N=8759 | 8 (0.03%), N=29860 | - |
| Posture Hunched | 0.54553 | - | 1 (0%), N=29860 | 1 (0.01%), N=12388 |
| Pupil Constricted | - | 2 (0.01%), N=17518 | - | - |
| Pupil Dilated | - | 4 (0.02%), N=17518 | - | - |
| Rectum Prolapsed | 0.14053 | 6 (0.07%), N=8759 | 4 (0.01%), N=29860 | - |
| Reproductive Tract Prolapsed | - | 3 (0.02%), N=17518 | - | - |
| Salivation | - | - | 15 (0.01%), N=119440 | - |
| Salivation After Dosing | - | - | 1 (0%), N=29860 | - |
| Scabbed Area | < 0.0001 | 1136 (12.97%), N=8759 | 1927 (6.45%), N=29860 | 1189 (9.6%), N=12388 |
| Scabbing | - | - | 1 (0%), N=29860 | - |
| Scar | 0.04869 | 339 (3.87%), N=8759 | 409 (1.37%), N=29860 | 82 (0.66%), N=12388 |
| Sex Skin Swelling | < 0.0001 | 308 (3.52%), N=8759 | 282 (0.94%), N=29860 | 4 (0.03%), N=12388 |
| Skin Cold To Touch | - | - | 1 (0%), N=29860 | - |
| Skin Discolored | < 0.0001 | 2004 (22.88%), N=8759 | 6756 (22.63%), N=29860 | 2672 (21.57%), N=12388 |
| Skin Dry | < 0.0001 | 194 (2.21%), N=8759 | 556 (1.86%), N=29860 | 280 (2.26%), N=12388 |
| Skin Thickened And Leathery | - | 5 (0.06%), N=8759 | - | - |
| Skin Thickening | - | - | 26 (0.01%), N=298600 | - |
| Skin Warm To Touch | - | - | 1 (0%), N=29860 | - |
| Stereotypy | - | - | 33 (0.03%), N=119440 | - |
| Swelling | 0.00045 | 25 (0.29%), N=8759 | 228 (0.76%), N=29860 | 253 (2.04%), N=12388 |
| Tail Bent | 0.00171 | 76 (0.87%), N=8759 | 130 (0.44%), N=29860 | - |
| Tail Missing | - | - | 9 (0.03%), N=29860 | - |
| Tail Missing - Portion | 0.17535 | 20 (0.23%), N=8759 | 869 (2.91%), N=29860 | 40 (0.32%), N=12388 |
| Teeth Broken | 0.71727 | 2 (0.02%), N=8759 | 5 (0.02%), N=29860 | - |
| Teeth Discolored | - | - | 10 (0.02%), N=59720 | - |
| Teeth Missing | 0.14224 | 16 (0.18%), N=8759 | 63 (0.21%), N=29860 | - |
| Thin | < 0.0001 | 73 (0.83%), N=8759 | 214 (0.72%), N=29860 | 14 (0.11%), N=12388 |
| Trembling | - | - | 1 (0%), N=29860 | - |
| Tremors | 0.62023 | - | 3 (0.01%), N=29860 | 1 (0.01%), N=12388 |
| Twitching | - | - | 1 (0%), N=29860 | - |
| Umbilical Hernia | - | - | 1 (0%), N=29860 | - |
| Unkempt Appearance | 0.0021 | 8 (0.09%), N=8759 | 15 (0.05%), N=29860 | 33 (0.27%), N=12388 |
| Vocalization | < 0.0001 | 31 (0.35%), N=8759 | 46 (0.15%), N=29860 | - |
| Vulva Enlarged | - | 3 (0.03%), N=8759 | - | - |
